# Supplementary material
Source: PubMed Central journal article supplement (PMC7209774)
Supplement: supp_fig1_dez149.pdf [file supp_fig1_dez149.pdf]

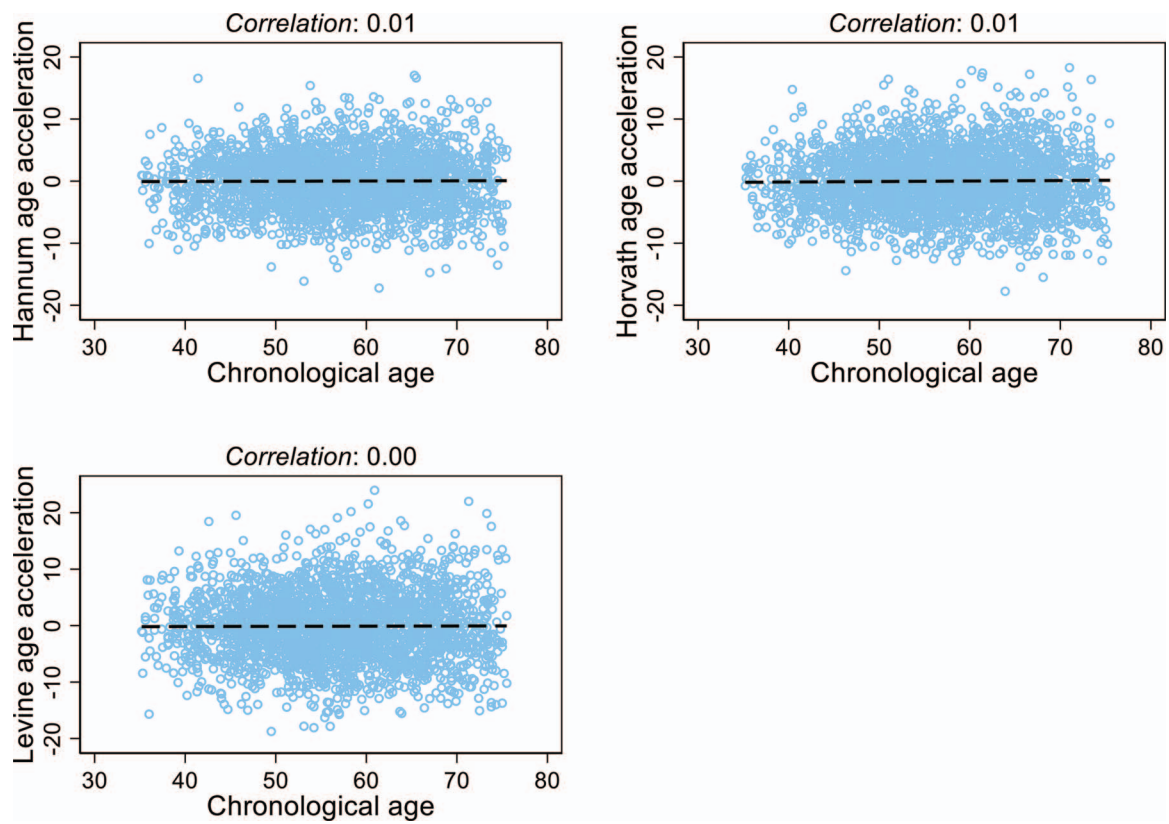

**Supplementary Figure S1** Scatter plots and Pearson correlations for the three age acceleration measures and chronological age.
