# Supplementary material
Source: PubMed Central journal article supplement (PMC7209774)
Supplement: supp_fig2_dez149.pdf [file supp_fig2_dez149.pdf]

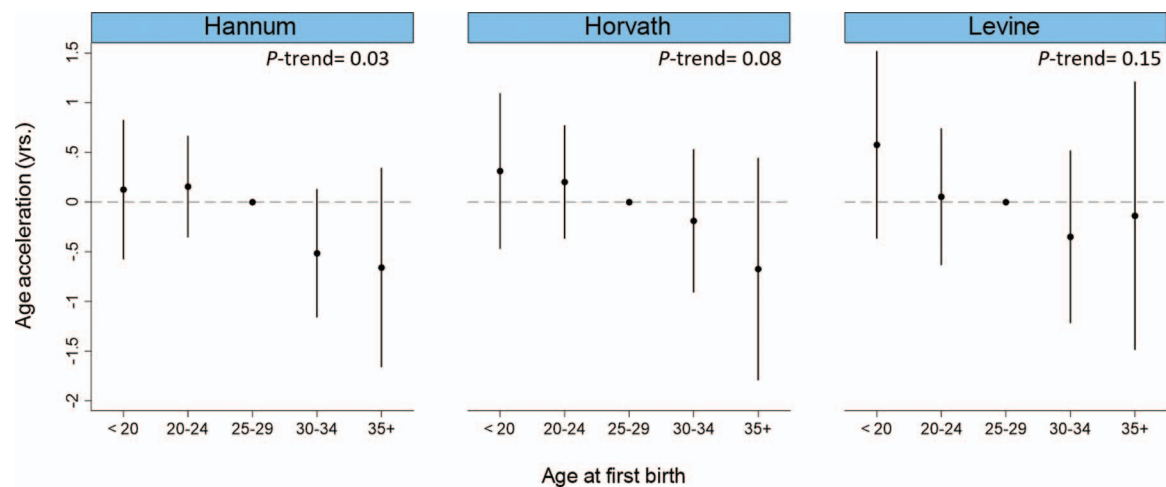

**Supplementary Figure S2** Associations between age at first birth category and Hannum, Horvath and Levine age acceleration metrics among parous women. Models adjust for number of live births and early adulthood characteristics. Women with ages at first birth between 25 and 29 years were treated as the referent category.
